# Supplementary material for: Rational design of NiO/Ti3C2Tx nanocomposites with enhanced triethylamine sensing performance
Source: Royal Society of Chemistry journal article supplement (doi:10.1039/d3an02191b), 2024-01-01
Supplement: d3an02191b1.pdf [file d3an02191b1.pdf]

## Supporting Information

### **Rational design of NiO/Ti<sub>3</sub>C<sub>2</sub>T<sub>x</sub> nanocomposites with enhanced trimethylamine sensing performance**

**Yutong Han<sup>#</sup>, Wenyu Zhang<sup>#</sup>, Yuan Ding, Yu Yao, Zhigang Zhu<sup>\*</sup>**

School of Health Science and Engineering, University of Shanghai for Science and Technology,  
Shanghai 200093, People's Republic of China

<sup>\*</sup>Corresponding author, Email address: zhigang\_zhu259@163.com (Z. Zhu)

<sup>#</sup> These authors contributed equally to this work.

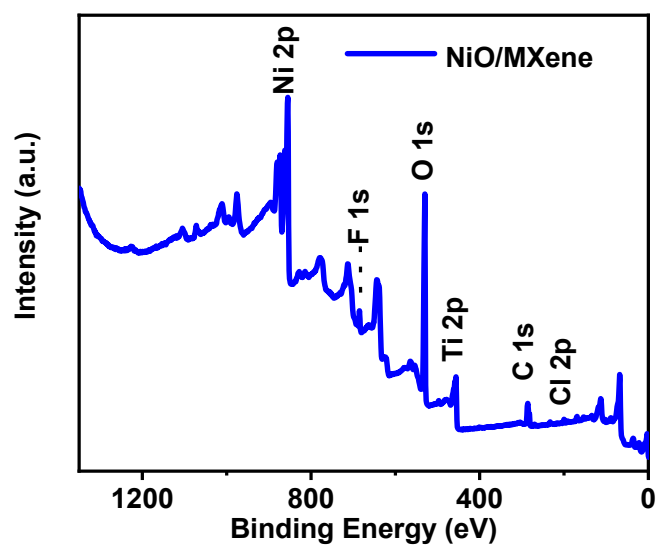

Fig. S1 The full XPS spectrum of NiO/Ti<sub>3</sub>C<sub>2</sub>T<sub>x</sub>.

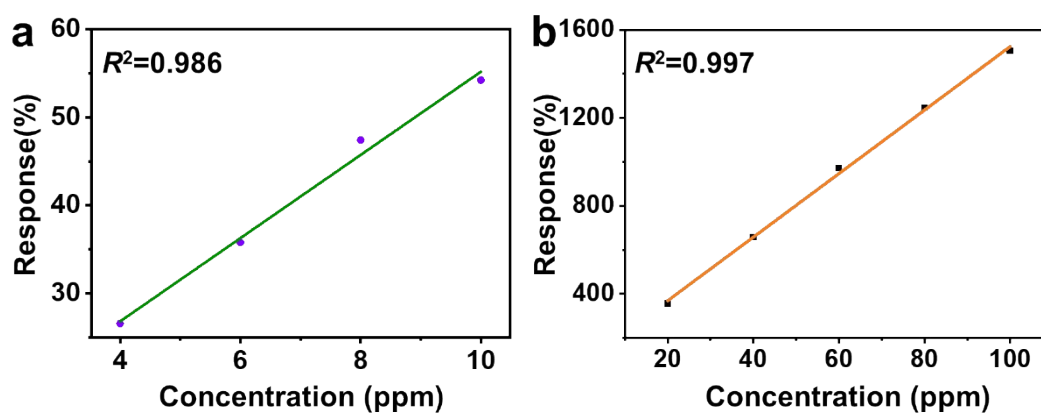

Fig. S2 The fitting curves between gas concentrations and response values of the NiO/Ti<sub>3</sub>C<sub>2</sub>T<sub>x</sub> sensor.
